# Supplementary material for: Ultrafast Bulk Degradation of Polylactic Acid by Artificially Cultured Diatom Frustules
Source: Research Square preprint supplement (doi:10.21203/rs.3.rs-720034/v1), 2021-07-21
Supplement: Supplementary file 1 [file 19348a68b369f887490e90b8.docx]

**Supplementary information**


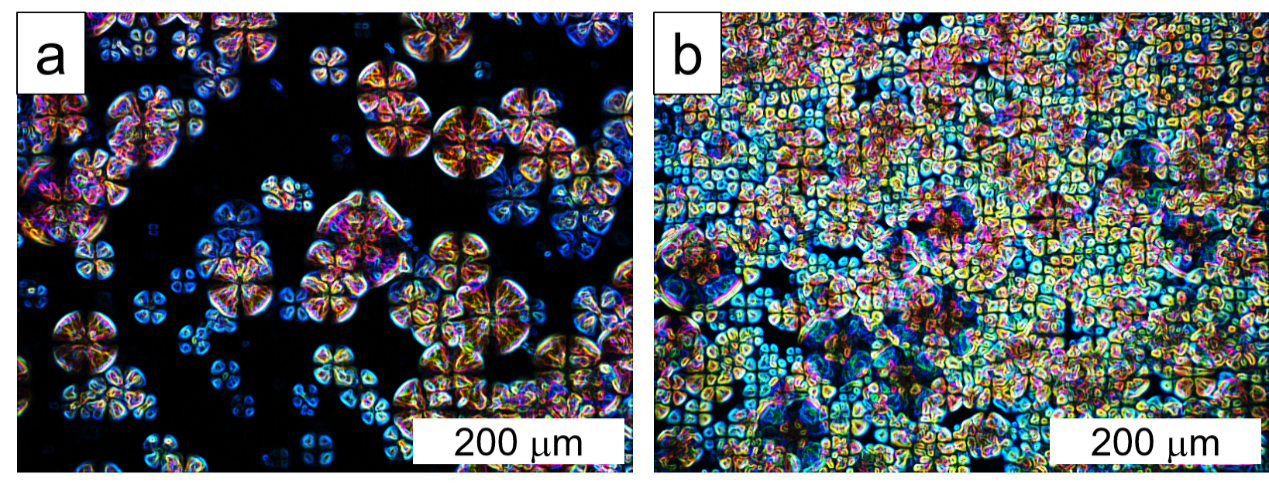


**Fig. 1 Polarization microscope images (POM) at room temperature.** **a** Pure PLA. **b** PLA/DF composites.


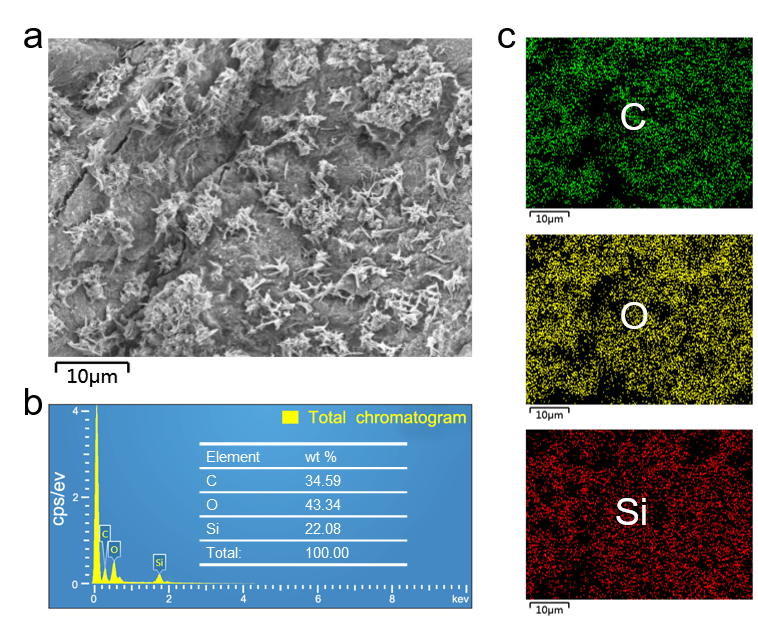


**Fig. 2 Energy dispersive spectroscopy (EDS) analysis.** **a** SEM image. **b** Total chromatogram. Inset table: element composition ratio. **c** Distribution maps of elements including C, O and Si.


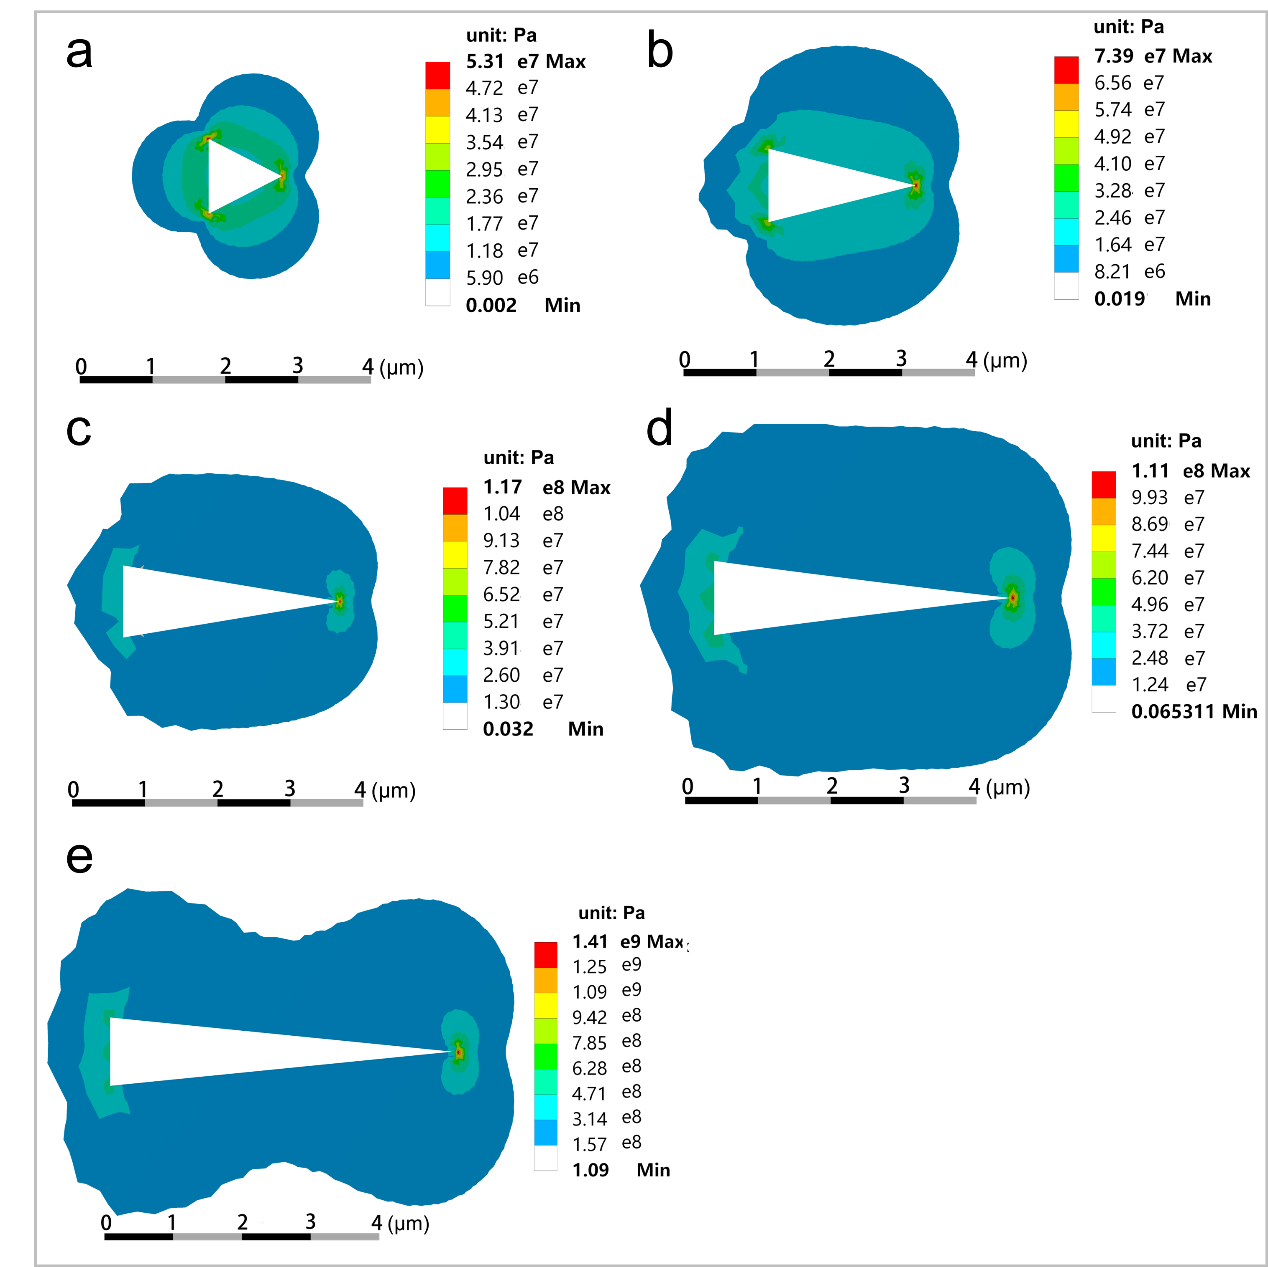


**Fig. 3 Stress nephograms under inter stress of 10 MPa with different crack length. a-e** Crack length is 1 μm, 2 μm, 3 μm, 4 μm and 5 μm, respectively.
